# Supplementary material
Source: Springer Nature journal article supplement (https://www.springermedizin.de/resource/supplementary/12894_2013_311_MOESM2_ESM.pdf/9513458)

### A. Sagittal view

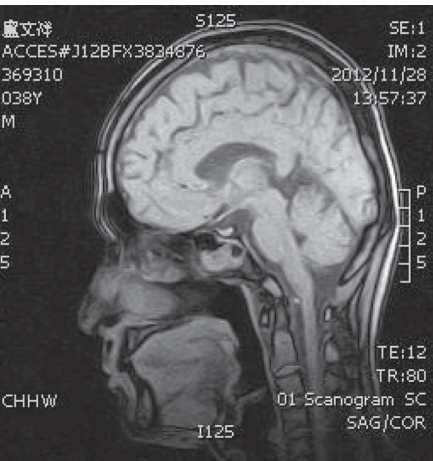

### B. Sagittal view

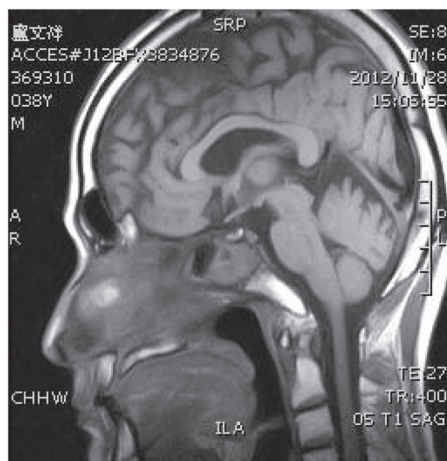

### C. Sagittal view

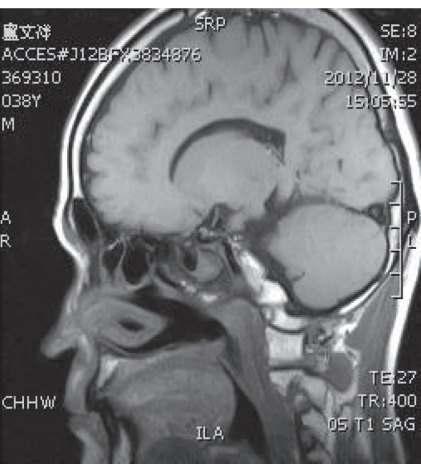

### D. Sagittal view

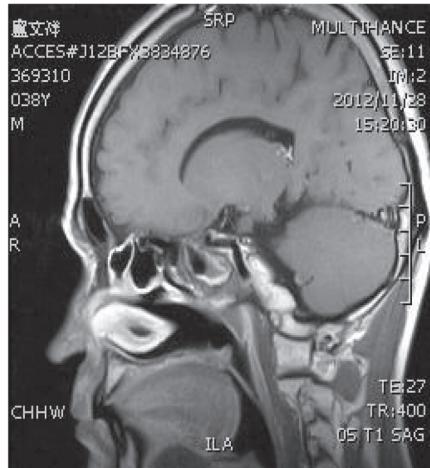

Supplement: MOESM2 [file 9513458]
